# Supplementary material
Source: PubMed Central journal article supplement (PMC3421691)
Supplement: JVI.00293-12_zjv999096300so1.pdf [file JVI.00293-12_zjv999096300so1.pdf]

## Supplemental Material for

### **Metagenomic characterization of airborne viral DNA diversity in the near-surface atmosphere**

Tae Woong Whon, Min-Soo Kim, Seong Woon Roh, Na-Ri Shin, Hae-Won Lee, and Jin-  
Woo Bae\*

\*To whom correspondence should be addressed. E-mail: [baejw@khu.ac.kr](mailto:baejw@khu.ac.kr)

#### **This PDF file includes:**

FIG. S1 to S4

TABLES S1 to S4

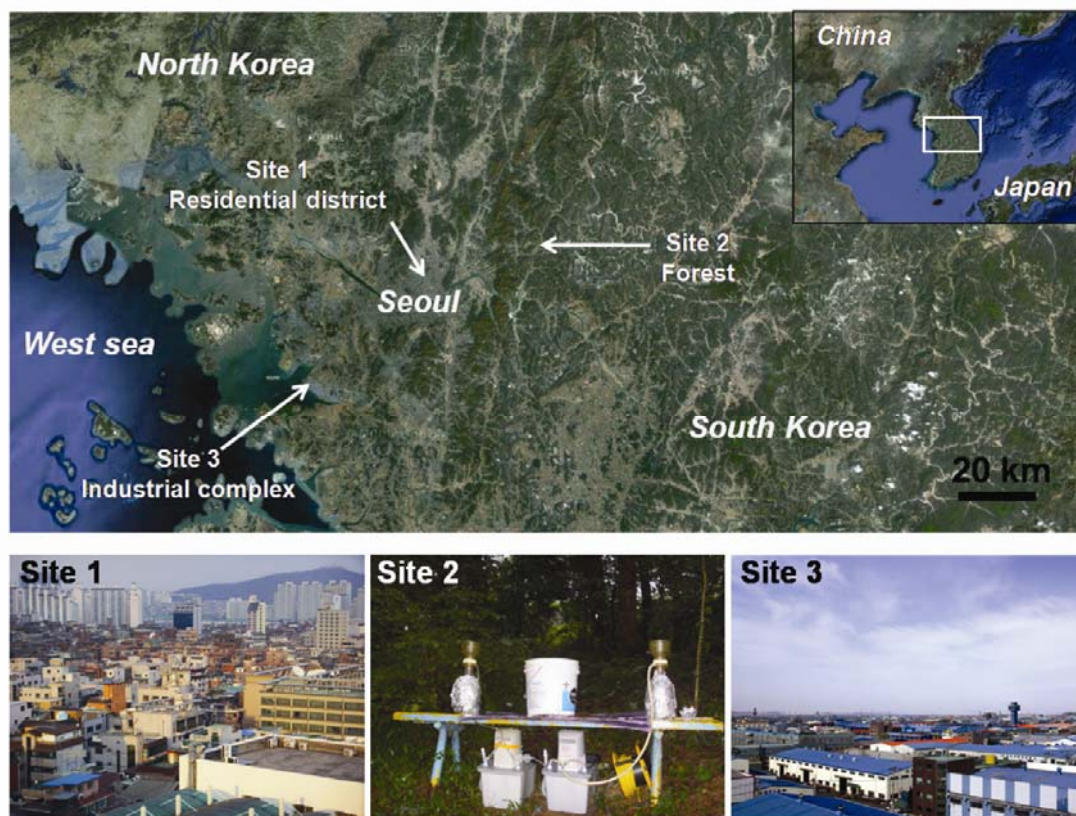

**FIG. S1.** Sampling sites (map from <http://earth.google.com/>) and land-use type images. Site 1 (RD) was located in the middle of Seoul city. Sites 2 (FR) and 3 (IC) were located in the central region and west coast of Korea, respectively.

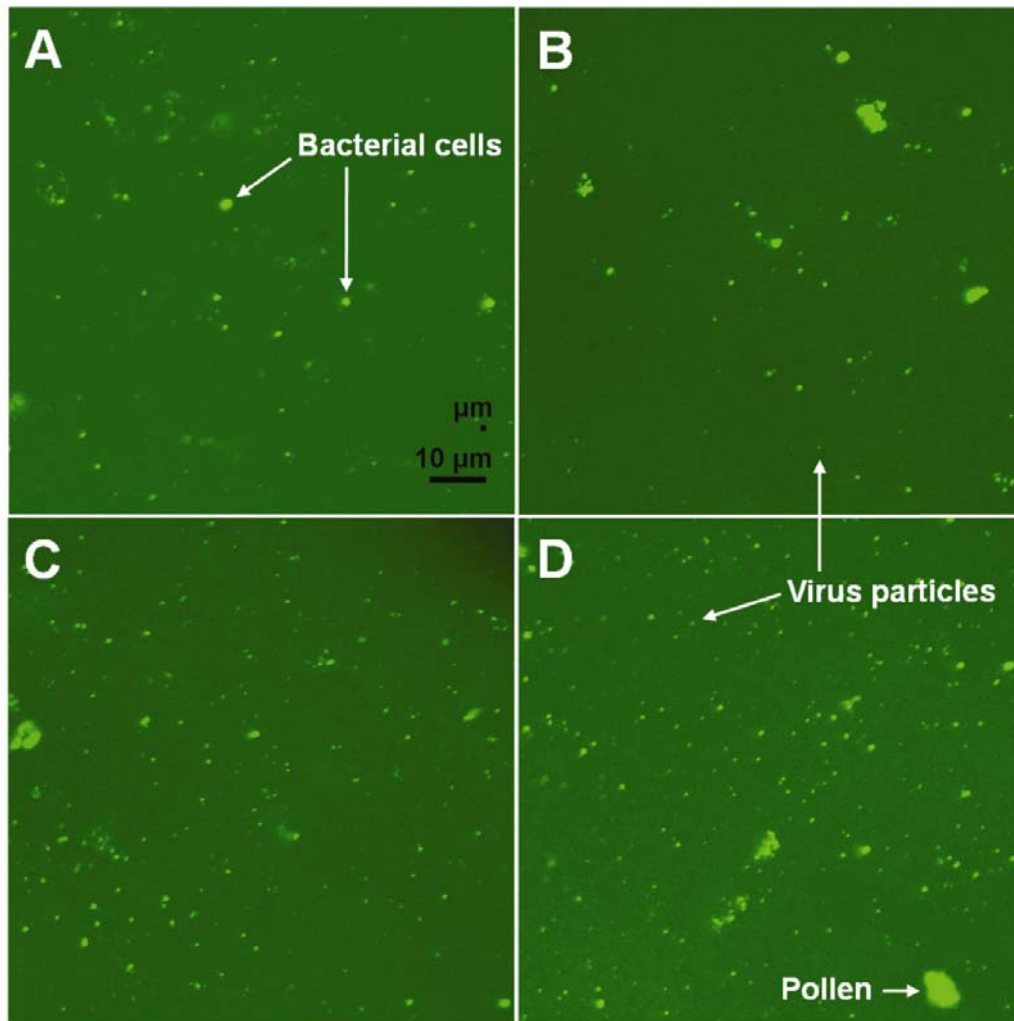

**FIG. S2.** Virus particles stained with SYBR-Gold and visualized under confocal laser scanning microscopy. Airborne particles containing viruses and bacteria were collected from RD during October (A), November (B), December, 2010 (C), and January, 2011 (D).

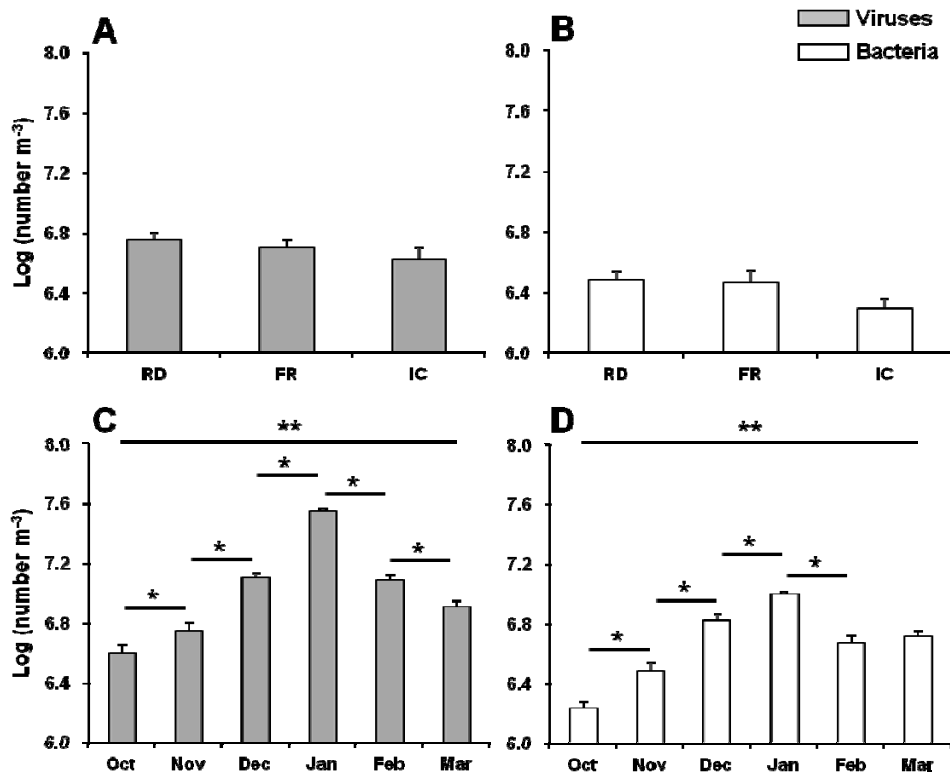

**FIG. S3.** Spatial and temporal abundance of airborne viruses and bacteria collected from the three different land-use types. For spatial variation, total viral (A,  $P = 0.228$ , one-way ANOVA) and bacterial (B,  $P = 0.136$ , one-way ANOVA) abundance in the samples collected from the residential district (RD), forest (FR), and industrial complex (IC) on November, 2010. For temporal variation, total viral (C) and bacterial (D) abundance in the samples collected at the RD site during 6 months. For C and D,  $n = 8-10$ ; \*  $P < 0.05$ , \*\*  $P < 0.001$ , one-way ANOVA with Duncan correction. Error bars represent standard error of means.

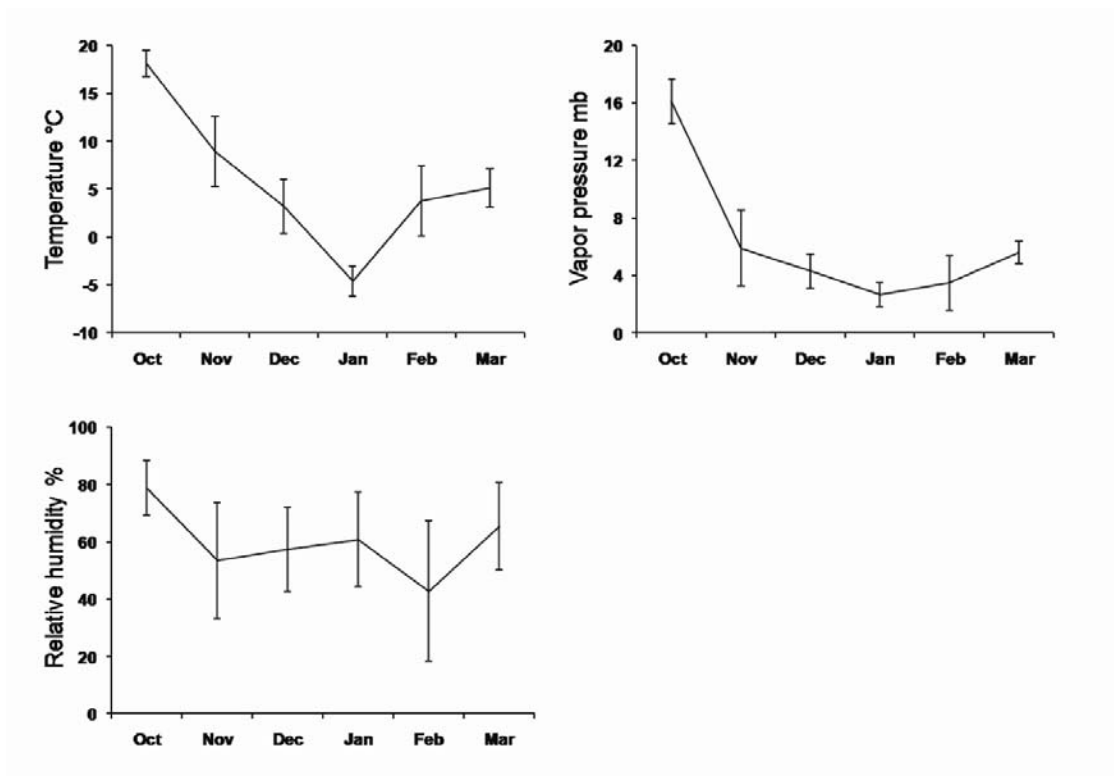

**FIG. S4.** Meteorological conditions (Temperature,  $n = 48$ ; Vapor pressure,  $n = 16$ ; Relative humidity,  $n = 48$ ) at the RD site during air sampling period. Error bars represent standard deviation of means.

**TABLE S1.** Description of collected samples and corresponding meteorological conditions

| <i>Land type</i> | <i>Date</i>                             | <i>Latitude,<br/>longitude</i> | <i>Elevation<br/>(m)</i> | <i>Sampling<br/>time (h)</i> | <i>AOP<br/>(mm)</i> | <i>Temp. (°C)</i> | <i>RH (%)</i> | <i>VP (mbar)</i> |
|------------------|-----------------------------------------|--------------------------------|--------------------------|------------------------------|---------------------|-------------------|---------------|------------------|
| RD               | 08/20~22 <sup>th</sup> /10 <sup>a</sup> | 37°35' N 127°03' E             | 66                       | 48                           | -                   | 28.6 (2.3)        | 69.2 (11.0)   | -                |
| RD               | 10/10~12 <sup>th</sup> /10 <sup>b</sup> | 37°35' N 127°03' E             | 66                       | 48                           | -                   | 18.1 (1.4)        | 78.8 (9.6)    | 16.1 (1.6)       |
| RD               | 11/12~14 <sup>th</sup> /10 <sup>b</sup> | 37°35' N 127°03' E             | 66                       | 48                           | -                   | 8.9 (3.6)         | 53.5 (20.2)   | 5.9 (2.6)        |
| RD               | 12/21~23 <sup>th</sup> /10 <sup>b</sup> | 37°35' N 127°03' E             | 66                       | 48                           | -                   | 3.2 (2.8)         | 57.4 (14.8)   | 4.3 (1.2)        |
| RD               | 01/21~23 <sup>th</sup> /11 <sup>b</sup> | 37°35' N 127°03' E             | 66                       | 48                           | -                   | -4.6 (1.6)        | 60.8 (16.5)   | 2.7 (0.8)        |
| RD               | 02/24~26 <sup>th</sup> /11 <sup>b</sup> | 37°35' N 127°03' E             | 66                       | 48                           | -                   | 3.8 (3.7)         | 42.8 (24.6)   | 3.5 (1.9)        |
| RD               | 03/27~29 <sup>th</sup> /11 <sup>b</sup> | 37°35' N 127°03' E             | 66                       | 48                           | -                   | 5.1 (2.0)         | 65.5 (15.2)   | 5.6 (0.8)        |
| RD-Rain          | 09/02 <sup>nd</sup> /10 <sup>a</sup>    | 37°35' N 127°03' E             | 66                       | -                            | 37.0                | 24.1 (1.2)        | 83.0 (7.3)    | -                |
| FR               | 09/07~09 <sup>th</sup> /10 <sup>a</sup> | 37°43' N 127°16' E             | 157                      | 48                           | -                   | 21.3 (1.9)        | 72.6 (13.3)   | -                |
| FR               | 11/03~05 <sup>th</sup> /10 <sup>b</sup> | 37°43' N 127°16' E             | 157                      | 48                           | -                   | 6.6 (5.2)         | 81.6 (17.7)   | -                |
| IC               | 09/14~16 <sup>th</sup> /10 <sup>a</sup> | 37°20' N 126°42' E             | 38                       | 48                           | -                   | 24.3 (2.9)        | 69.7 (19.1)   | -                |
| IC               | 11/16~18 <sup>th</sup> /10 <sup>b</sup> | 37°20' N 126°42' E             | 38                       | 48                           | -                   | 6.0 (2.6)         | 75.0 (13.2)   | -                |

Abbreviations: AOP, amount of precipitation; Temp, temperature; RH, relative humidity; VP, vapor pressure; RD, residential district;

RD-Rain, rainwater precipitated at the RD site; FR, forest; IC, industrial complex.

<sup>a</sup>Air sampling for genotypic diversity of viruses.

<sup>b</sup>Air sampling for viruses and bacteria enumeration.

For each type of meteorological conditions (Temp.,  $n = 48$ ; RH,  $n = 48$ ; VP,  $n = 16$ ), general mean values and s.d. (in parenthesis) are given.

**TABLE S2.** BLAST profile of four viromes compared with two public databases, *i.e.*, the CAMERA viral protein and CAMERA nr databases

|                         | No. of sequences (%)      |                    |                         |                     |                           |                    |                         |                     |
|-------------------------|---------------------------|--------------------|-------------------------|---------------------|---------------------------|--------------------|-------------------------|---------------------|
|                         | CAMERA_v                  |                    |                         |                     | CAMERA_nr                 |                    |                         |                     |
|                         | BLASTx ( $E < 10^{-3}$ )  |                    |                         |                     | BLASTx ( $E < 10^{-3}$ )  |                    |                         |                     |
|                         | Residential district (RD) | Forest (FR)        | Industrial complex (IC) | Rainwater (RD-Rain) | Residential district (RD) | Forest (FR)        | Industrial complex (IC) | Rainwater (RD-Rain) |
| <b>Raw reads</b>        | 24,721                    | 23,316             | 20,578                  | 18,829              | 24,721                    | 23,316             | 20,578                  | 18,829              |
| <b>Quality-filtered</b> | 18,427                    | 20,903             | 14,754                  | 15,914              | 18,427                    | 20,903             | 14,754                  | 15,914              |
| <b>Non-redundant</b>    | 17,943<br>(100%)          | 20,691<br>(100%)   | 14,332<br>(100%)        | 15,776<br>(100%)    | 17,943<br>(100%)          | 20,691<br>(100%)   | 14,332<br>(100%)        | 15,776<br>(100%)    |
| <b>Unknown</b>          | 10,590<br>(59.02%)        | 10,290<br>(49.73%) | 11,463<br>(79.98%)      | 12,604<br>(79.89%)  | 10,683<br>(59.54%)        | 12,801<br>(61.87%) | 12,491<br>(87.15%)      | 13,336<br>(84.53%)  |
| <b>Known</b>            | 7,353<br>(40.98%)         | 10,401<br>(50.27%) | 2,869<br>(20.02%)       | 3,172<br>(20.11%)   | 7,260<br>(40.46%)         | 7,890<br>(38.13%)  | 1,841<br>(12.85%)       | 2,440<br>(15.47%)   |
| <b>Virus</b>            | 7,353<br>(40.98%)         | 10,401<br>(50.27%) | 2,869<br>(20.02%)       | 3,172<br>(20.11%)   | 5,812<br>(32.39%)         | 7,074<br>(34.19%)  | 1,449<br>(10.11%)       | 1,508<br>(9.56%)    |
| <b>bacteria</b>         | -                         | -                  | -                       | -                   | 1,407<br>(7.84%)          | 28<br>(0.14%)      | 236<br>(1.65%)          | 501<br>(3.18%)      |
| <b>Eukarya</b>          | -                         | -                  | -                       | -                   | 40<br>(0.22%)             | 787<br>(3.80%)     | 143<br>(1.00%)          | 430<br>(2.73%)      |
| <b>Other</b>            | -                         | -                  | -                       | -                   | 1<br>(0.01%)              | 1<br>(0.01%)       | 13<br>(0.09%)           | 1<br>(0.01%)        |



**TABLE S3.** Profiles of viral families from the four viromes compared with two public databases, *i.e.*, the CAMERA viral protein and CAMERA nr databases

|                                                   |                                   | CAMERA_v                 |        |                    |           | CAMERA_nr                |        |                    |           |
|---------------------------------------------------|-----------------------------------|--------------------------|--------|--------------------|-----------|--------------------------|--------|--------------------|-----------|
|                                                   |                                   | BLASTx ( $E < 10^{-3}$ ) |        |                    |           | BLASTx ( $E < 10^{-3}$ ) |        |                    |           |
|                                                   |                                   | Residential district     | Forest | Industrial complex | Rainwater | Residential district     | Forest | Industrial complex | Rainwater |
|                                                   |                                   | (RD)                     | (FR)   | (IC)               | (RD-Rain) | (RD)                     | (FR)   | (IC)               | (RD-Rain) |
| <b>Virus sequences</b>                            |                                   | 7,353                    | 10,401 | 2,869              | 3,172     | 5,812                    | 7,074  | 1,449              | 1,508     |
| <b>dsDNA</b>                                      | <b>Myo-</b>                       | 1                        | 0      | 6                  | 0         | 0                        | 0      | 0                  | 0         |
|                                                   | <b>Podo-</b>                      | 1                        | 0      | 3                  | 0         | 0                        | 0      | 0                  | 0         |
|                                                   | <b>Sipho-</b>                     | 3                        | 0      | 199                | 3         | 1                        | 0      | 21                 | 0         |
|                                                   | <b>Unclassified Caudovirales</b>  | 1                        | 1      | 19                 | 0         | 0                        | 0      | 2                  | 0         |
|                                                   | <b>Herpes-</b>                    | 1                        | 0      | 0                  | 0         | 0                        | 0      | 0                  | 0         |
|                                                   | <b>Polyoma-</b>                   | 0                        | 0      | 11                 | 0         | 0                        | 0      | 0                  | 0         |
|                                                   | <b>Pox-</b>                       | 0                        | 0      | 18                 | 0         | 0                        | 0      | 16                 | 0         |
|                                                   | <b>Unclassified-</b>              | 42                       | 11     | 23                 | 7         | 28                       | 2      | 0                  | 0         |
|                                                   | <b>Unclassified dsDNA phages</b>  | 2                        | 9      | 7                  | 7         | 1                        | 2      | 0                  | 0         |
|                                                   | <b>Unclassified dsDNA viruses</b> | 40                       | 2      | 15                 | 0         | 27                       | 0      | 0                  | 0         |
| <b>dsDNA viruses, no RNA stage</b>                | 0                                 | 0                        | 1      | 0                  | 0         | 0                        | 0      | 0                  |           |
| <b>Satellites</b>                                 | <b>Satellites</b>                 | 3                        | 16     | 9                  | 2         | 3                        | 8      | 5                  | 3         |
| <b>ssDNA</b>                                      | <b>Circo-</b>                     | 83                       | 599    | 221                | 48        | 40                       | 479    | 113                | 52        |
|                                                   | <b>Gemini-</b>                    | 144                      | 952    | 598                | 652       | 82                       | 317    | 357                | 98        |
|                                                   | <b>Ino-</b>                       | 2                        | 0      | 1                  | 0         | 0                        | 0      | 0                  | 0         |
|                                                   | <b>Micro-</b>                     | 90                       | 79     | 433                | 29        | 21                       | 21     | 78                 | 2         |
|                                                   | <b>Nano-</b>                      | 42                       | 32     | 18                 | 23        | 39                       | 24     | 7                  | 18        |
|                                                   | <b>Unclassified-</b>              | 6,721                    | 8,335  | 888                | 1,834     | 5,492                    | 5,949  | 604                | 1,282     |
|                                                   | <b>SsHADV-1</b>                   | 6,623                    | 7,976  | 228                | 1,589     | 5,461                    | 5,782  | 170                | 1,185     |
|                                                   | <b>Circovirus-like genomes</b>    | 40                       | 47     | 559                | 83        | 20                       | 46     | 422                | 26        |
|                                                   | <b>ssDNA viruses</b>              | 58                       | 311    | 101                | 162       | 11                       | 121    | 12                 | 71        |
|                                                   | <b>ssRNA</b>                      | <b>Tombus-</b>           | 1      | 0                  | 0         | 0                        | 1      | 0                  | 0         |
| <b>Rhabdo-</b>                                    |                                   | 0                        | 0      | 4                  | 0         | 0                        | 0      | 4                  | 0         |
| <b>Unclassified ssRNA positive-strand viruses</b> |                                   | 4                        | 2      | 51                 | 0         | 8                        | 4      | 45                 | 0         |
| <b>Unclassified</b>                               | <b>Unclassified-</b>              | 214                      | 374    | 367                | 574       | 97                       | 270    | 197                | 53        |
|                                                   | <b>Unclassified phages</b>        | 57                       | 2      | 13                 | 430       | 0                        | 0      | 0                  | 0         |
|                                                   | <b>Unclassified viruses</b>       | 52                       | 187    | 21                 | 12        | 56                       | 160    | 27                 | 41        |
|                                                   | <b>Viruses</b>                    | 105                      | 185    | 333                | 132       | 41                       | 110    | 170                | 12        |

Abbreviations: SsHADV-1, *Sclerotinia sclerotiorum* hypovirulence-associated DNA virus 1.

**TABLE S4.** Nonanucleotide and stem sequences of the stem-loop structure found in airborne circoviruses and nanoviruses

| <b>Virome</b>             | <b>Contig</b> | <b>Stem</b>  | <b>Loop</b>          | <b>Stem</b>  |
|---------------------------|---------------|--------------|----------------------|--------------|
| Residential District (RD) | Contig35      | AGTGTCCGGG   | CT <b>TAGTATTAC</b>  | CCCGGACACT   |
|                           | Contig164     | ACACGAGGAG   | ATT <b>TAGTATTAC</b> | CTCCTCGTGT   |
| Forest (FR)               | Contig4       | AGTGCCGG     | TAC <b>CAGTATTAC</b> | CCGCCACT     |
|                           | Contig26      | GTGGCCAG     | GAT <b>TAGTATTAC</b> | CTGGCCAC     |
|                           | Contig133     | CGAAGTCACGGG | <b>TAGTATTAC</b>     | CCCGTGACTTCG |
|                           | Contig134     | GGAAGTGACGG  | C <b>TAGTATTAC</b>   | CCGTCACTTCC  |
|                           | Contig139     | CACAAGTTGTCG | GCT <b>CTATATTAC</b> | CGACAACCTGTG |
| Industrial Complex (IC)   | Contig119     | GCGGGCTGG    | CGT <b>TAGTATTAC</b> | CCAGCCCGC    |
|                           | Contig126     | AAGAGGTGG    | CAT <b>TAGTATTAC</b> | CCACCTCTT    |
|                           | Contig132     | CAGAAGTGGCTG | CT <b>CAGTATTAC</b>  | CAGCCACTTCTG |
|                           | Contig138     | GGTGCCGG     | AC <b>CAGTATTAC</b>  | CCGGCACC     |
|                           | Contig139     | CCCAAAG      | GT <b>CAGTATTAC</b>  | CTTTTGGG     |
